# Supplementary material for: Structural evolution, electrochemical kinetic properties, and stability of A-site doped perovskite Sr1−xYbxCoO3−δ
Source: Royal Society of Chemistry journal article supplement (doi:10.1039/d0ta03476b), 2020-01-01
Supplement: d0ta03476b1.pdf [file d0ta03476b1.pdf]

## Supplementary information

### **Structural evolution, electrochemical kinetic properties, and stability of A-site doped perovskite**

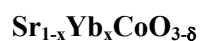

Chunyang Yang<sup>a</sup>, Yun Gan<sup>a</sup>, Myongjin Lee<sup>a</sup>, Chunlei Ren<sup>a</sup>, Kyle S. Brinkman<sup>b</sup>, Robert D. Green<sup>c</sup>, and

Xingjian Xue<sup>a,\*</sup>

<sup>a</sup> Department of Mechanical Engineering, University of South Carolina, Columbia, SC 29208, USA.

<sup>b</sup> Materials Science and Engineering, Clemson University, Clemson, SC 29634, USA.

<sup>c</sup> NASA Glenn Research Center, Cleveland, OH 44135, USA

\*Corresponding Author. Tel: 1-803-576-5598; Fax: 1-803-777-0106; Email: Xue@cec.sc.edu (X. Xue)

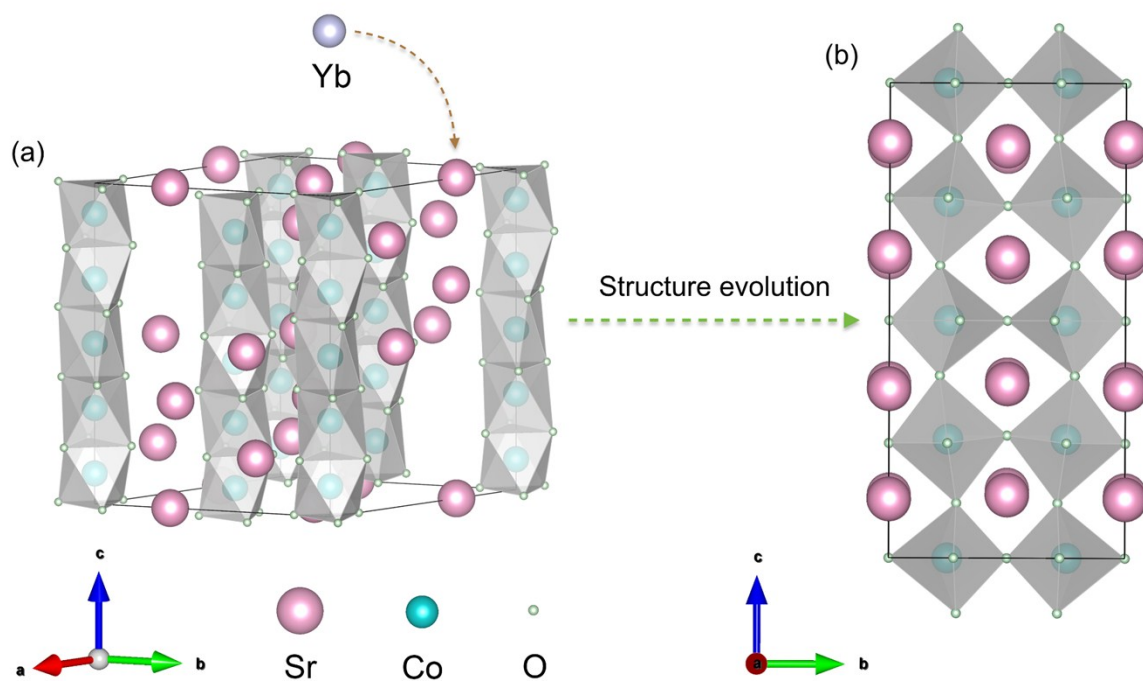

Fig. S1 Schematic of crystal structures: (a) SYbC0 at room temperature ( $\text{Sr}_6\text{Co}_5\text{O}_{15}$ , space group  $R32^1$ ), (b) SYbC10 at room temperature (space group  $I4/mmm^2$ ). The crystal structures are visualized with VESTA program.<sup>3</sup>

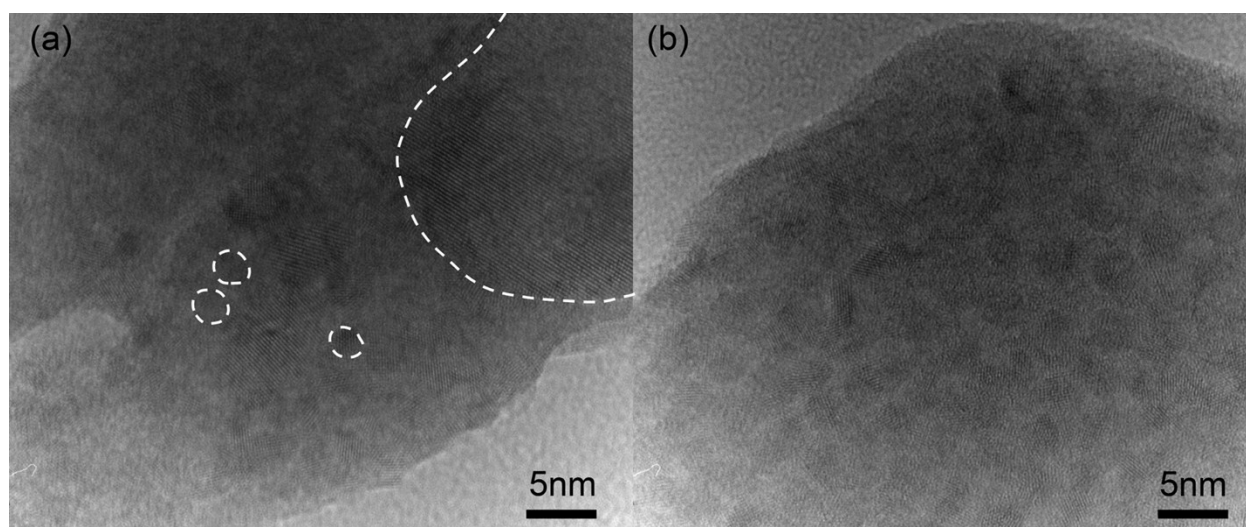

Fig. S2 TEM images of SYbC10 powder: (a) particles with different sizes are marked, (b) aggregation of small particles.

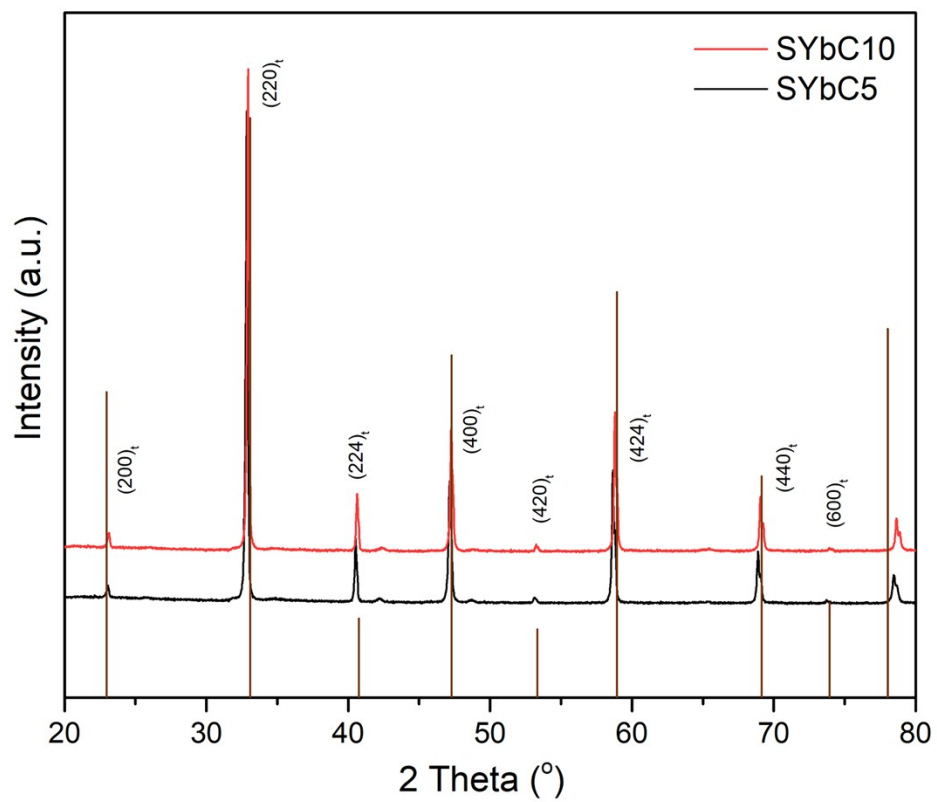

Fig. S3 XRD patterns of SYbC5 and SYbC10 powders calcinated at 1000 °C in air for 6 h, indices of tetragonal symmetry.

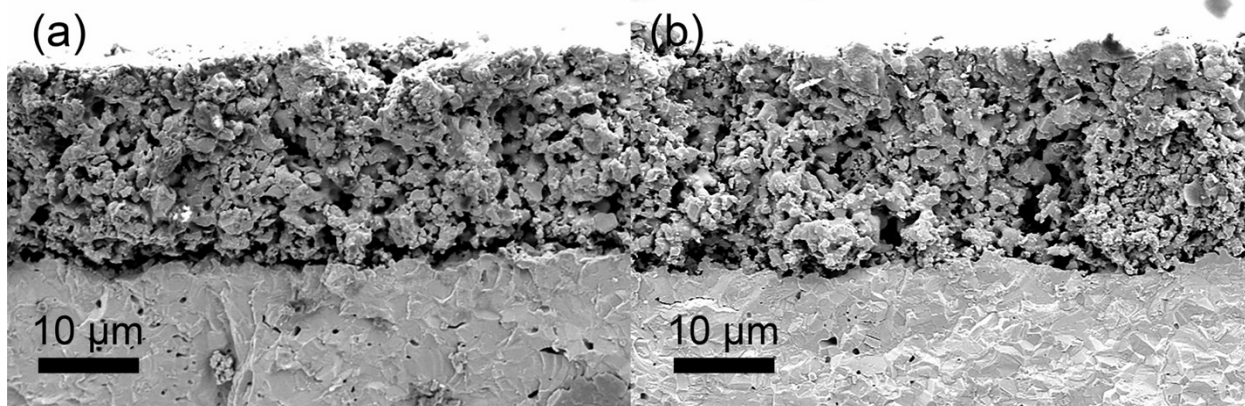

Fig. S4 Cross-sectional SEM micrographs of symmetrical cell with SYbc5 (a) and SYbc10 (b) electrode sintered at 1050 °C in air for 2 h.

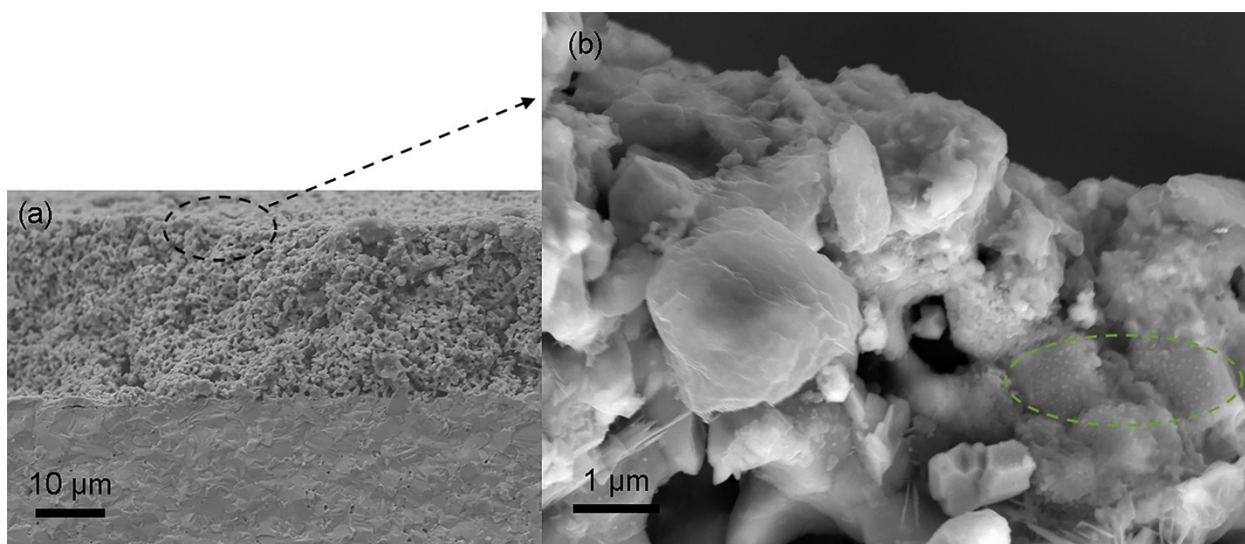

Fig. S5 Cross-sectional SEM micrographs of symmetrical cell with SYbc10 electrode after durability test (a) and locally enlarged SEM image (b), the area with surface exsolved nano-particles are marked.

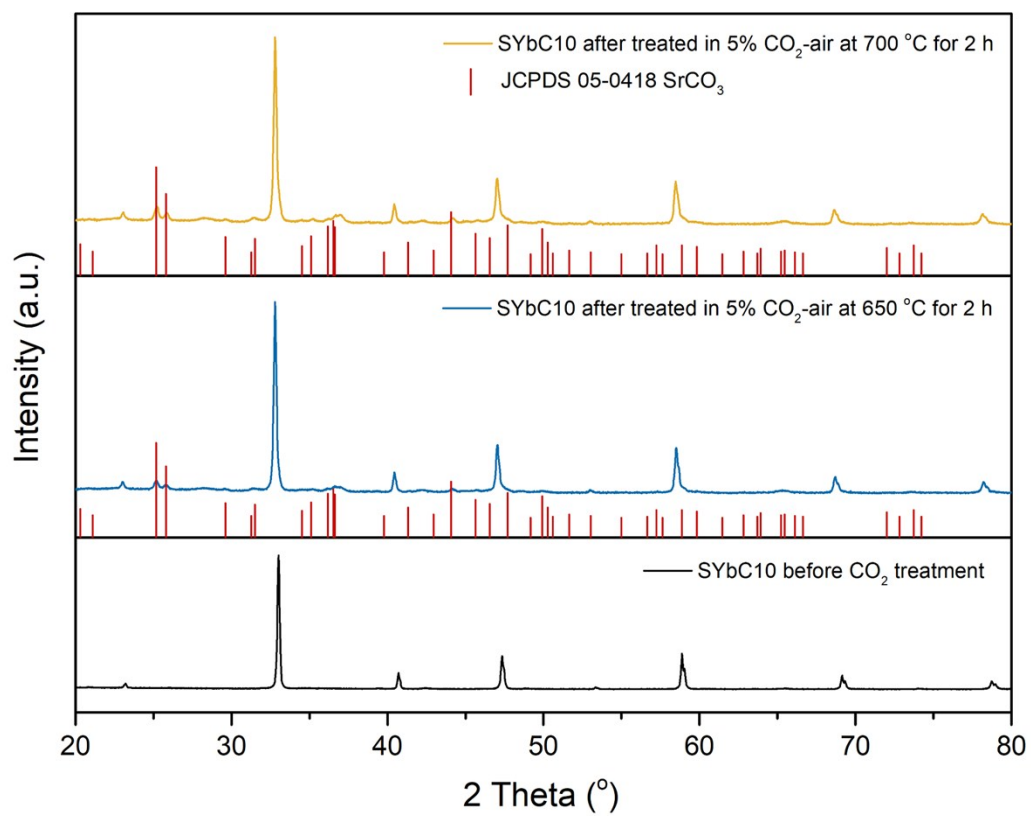

Fig. S6 XRD patterns of SYbC10 powders before and after treated at 700 and 650 °C respectively in 5% CO<sub>2</sub>-air for 2 h followed by cooling down under the protection of nitrogen gas, and peak position of SrCO<sub>3</sub> (JCPDS 05-0418).

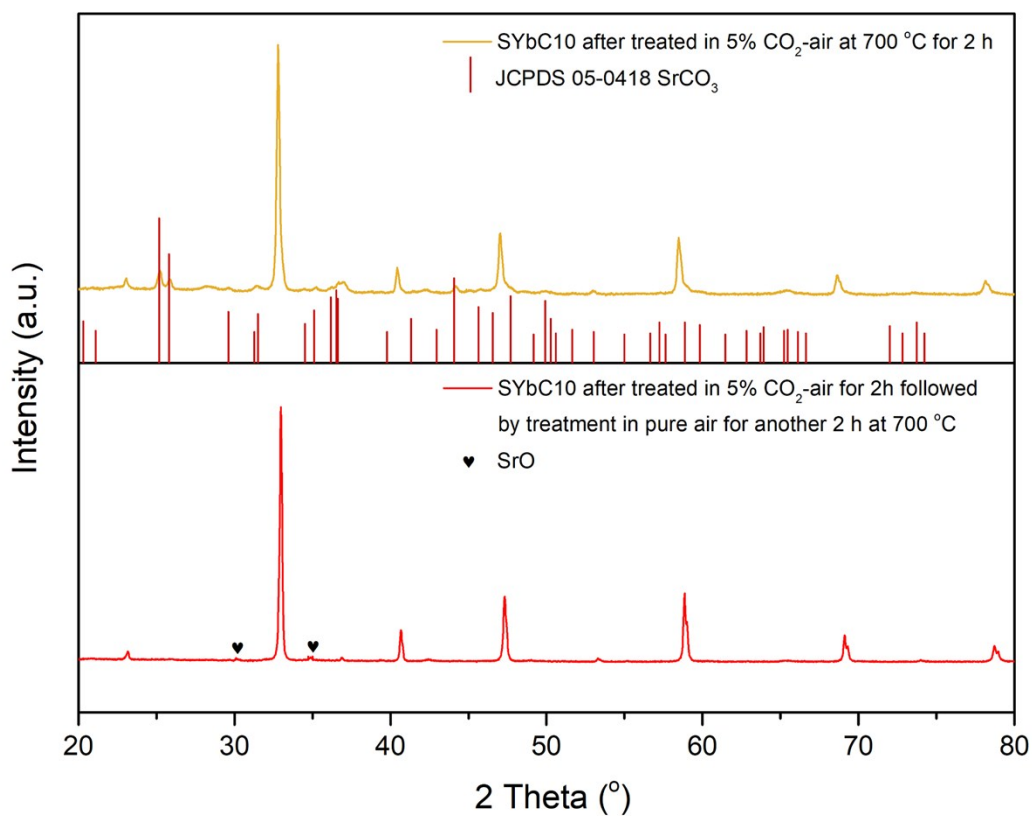

Fig. S7 XRD patterns of SYbC10 powders after treated at 700 in 5%  $\text{CO}_2$ -air for 2 h followed by cooling down under the protection of nitrogen gas, and those after treated at 700 in 5%  $\text{CO}_2$ -air for 2 h followed by treatment in pure air for another 2 h at 700 °C.

## References

1. W. T. Harrison, S. L. Hegwood and A. J. Jacobson, *J. Chem. Soc., Chem. Commun.*, 1995, 1953-1954.
2. C. Sarno, T. Yang, E. Di Bartolomeo, A. Huq, K. Huang and S. McIntosh, *Solid State Ionics*, 2018, **321**, 34-42.
3. K. Momma and F. Izumi, *J. Appl. Crystallogr.*, 2011, **44**, 1272-1276.
